# Supplementary material for: Updates to the checklist of the wild bee fauna of Luxembourg as inferred from revised natural history collection data and fieldwork
Source: Biodivers Data J. 2021 May 14;9:e64027. doi: 10.3897/BDJ.9.e64027 (PMC8139942; doi:10.3897/BDJ.9.e64027)
Supplement: Supplementary material 1 — Updated checklist of Luxembourgish wild bees (346 species) [file bdj-09-e64027-s001.xlsx]

## Sheet: Sheet1
Reference: Herrera-Mesías & Weigand: Updates to the checklist of the wild bee fauna of Luxembourg as inferred from revised natural history collection data and fieldwork. Conservation status retrieved from Nieto et al. (2014) for Europe.
Family	Genus	Species	Authorship	Conservation status	GBIF link	Reference	Notes
Andrenidae	Andrena	agilissima	(Scopoli, 1770)	Data Deficient (DD) in Europe	https://www.gbif.org/species/1356870	Species listed in Rasmont et al. (2017)
Andrenidae	Andrena	alfkenella	Perkins, 1914	Data Deficient (DD) in Europe	https://www.gbif.org/species/1357170	Species listed in Rasmont et al. (2017)
Andrenidae	Andrena	angustior	(Kirby, 1802)	Data Deficient (DD) in Europe	https://www.gbif.org/species/1357490	Species listed in Rasmont et al. (2017)
Andrenidae	Andrena	anthrisci	Blüthgen, 1925	Least Concern (LC) in Europe	https://www.gbif.org/species/1358360	Species listed in Rasmont et al. (2017)
Andrenidae	Andrena	apicata	Smith, 1847	Data Deficient (DD) in Europe	https://www.gbif.org/species/1357628	Species listed in Rasmont et al. (2017)
Andrenidae	Andrena	barbilabris	(Kirby, 1802)	Data Deficient (DD) in Europe	https://www.gbif.org/species/1358165	Species listed in Rasmont et al. (2017)
Andrenidae	Andrena	bicolor	Fabricius, 1775	Least Concern (LC) in Europe	https://www.gbif.org/species/1356887	Species listed in Rasmont et al. (2017)
Andrenidae	Andrena	bimaculata	(Kirby, 1802)	Data Deficient (DD) in Europe	https://www.gbif.org/species/1357005	Species listed in Rasmont et al. (2017)
Andrenidae	Andrena	carantonica	Pérez, 1902	Data Deficient (DD) in Europe	https://www.gbif.org/species/1357950	Species listed in Rasmont et al. (2017)
Andrenidae	Andrena	chrysopus	Pérez, 1903	Data Deficient (DD) in Europe	https://www.gbif.org/species/1358167	Species listed in Rasmont et al. (2017)
Andrenidae	Andrena	chrysopyga	Schenck, 1853	Data Deficient (DD) in Europe	https://www.gbif.org/species/1358209	Species listed in Rasmont et al. (2017)
Andrenidae	Andrena	chrysosceles	(Kirby, 1802)	Data Deficient (DD) in Europe	https://www.gbif.org/species/1358259	Species listed in Rasmont et al. (2017)
Andrenidae	Andrena	cineraria	(Linnaeus, 1758)	Least Concern (LC) in Europe	https://www.gbif.org/species/1358088	Species listed in Rasmont et al. (2017)
Andrenidae	Andrena	clarkella	(Kirby, 1802)	Data Deficient (DD) in Europe	https://www.gbif.org/species/1357338	Species listed in Rasmont et al. (2017)
Andrenidae	Andrena	coitana	(Kirby, 1802)	Data Deficient (DD) in Europe	https://www.gbif.org/species/1357215	Species listed in Rasmont et al. (2017)
Andrenidae	Andrena	combinata	(Christ, 1791)	Data Deficient (DD) in Europe	https://www.gbif.org/species/1358177	Species listed in Rasmont et al. (2017)
Andrenidae	Andrena	curvungula	Thomson, 1870	Data Deficient (DD) in Europe	https://www.gbif.org/species/1357234	Species listed in Rasmont et al. (2017)
Andrenidae	Andrena	decipiens	Schenck, 1861	Data Deficient (DD) in Europe	https://www.gbif.org/species/1356936	Species listed in Rasmont et al. (2017)
Andrenidae	Andrena	denticulata	(Kirby, 1802)	Data Deficient (DD) in Europe	https://www.gbif.org/species/1357548	Species listed in Rasmont et al. (2017)
Andrenidae	Andrena	distinguenda	Schenck, 1871	Data Deficient (DD) in Europe	https://www.gbif.org/species/1357737	Species listed in Rasmont et al. (2017)
Andrenidae	Andrena	dorsata	(Kirby, 1802)	Data Deficient (DD) in Europe	https://www.gbif.org/species/1357872	Species listed in Rasmont et al. (2017)
Andrenidae	Andrena	flavilabris	Schenck, 1874	Data Deficient (DD) in Europe	https://www.gbif.org/species/9328031	Species listed in Rasmont et al. (2017)
Andrenidae	Andrena	flavipes	Panzer, 1799	Least Concern (LC) in Europe	https://www.gbif.org/species/1357156	Species listed in Rasmont et al. (2017)
Andrenidae	Andrena	florea	Fabricius, 1793	Data Deficient (DD) in Europe	https://www.gbif.org/species/1357334	Species listed in Rasmont et al. (2017)
Andrenidae	Andrena	floricola	Eversmann, 1852	Data Deficient (DD) in Europe	https://www.gbif.org/species/1357362	Species listed in Rasmont et al. (2017)
Andrenidae	Andrena	fucata	Smith, 1847	Data Deficient (DD) in Europe	https://www.gbif.org/species/1357543	Species listed in Rasmont et al. (2017)
Andrenidae	Andrena	fulva	(Müller, 1766)	Data Deficient (DD) in Europe	https://www.gbif.org/species/1357646	Species listed in Rasmont et al. (2017)
Andrenidae	Andrena	fulvago	(Christ, 1791)	Data Deficient (DD) in Europe	https://www.gbif.org/species/9805254	Species listed in Rasmont et al. (2017)
Andrenidae	Andrena	fulvata	Stoeckhert, 1930	Data Deficient (DD) in Europe	https://www.gbif.org/species/1357663	Species listed in Rasmont et al. (2017)
Andrenidae	Andrena	fulvida	Schenck, 1853	Near Threatened (NT) in Europe	https://www.gbif.org/species/1357732	Species listed in Rasmont et al. (2017)
Andrenidae	Andrena	fuscipes	(Kirby, 1802)	Data Deficient (DD) in Europe	https://www.gbif.org/species/1357812	Species listed in Rasmont et al. (2017)
Andrenidae	Andrena	gelriae	van der Vecht, 1927	Data Deficient (DD) in Europe	https://www.gbif.org/species/1358024	Species listed in Rasmont et al. (2017)
Andrenidae	Andrena	gravida	Imhoff, 1832	Data Deficient (DD) in Europe	https://www.gbif.org/species/1358314	Species listed in Rasmont et al. (2017)
Andrenidae	Andrena	haemorrhoa	(Fabricius, 1781)	Least Concern (LC) in Europe	https://www.gbif.org/species/1356981	Species listed in Rasmont et al. (2017)
Andrenidae	Andrena	hattorfiana	(Fabricius, 1775)	Near Threatened (NT) in Europe	https://www.gbif.org/species/1357364	Species listed in Rasmont et al. (2017)
Andrenidae	Andrena	helvola	(Linnaeus, 1758)	Data Deficient (DD) in Europe	https://www.gbif.org/species/1357179	Species listed in Rasmont et al. (2017)
Andrenidae	Andrena	humilis	Imhoff, 1832	Data Deficient (DD) in Europe	https://www.gbif.org/species/1357477	Species listed in Rasmont et al. (2017)
Andrenidae	Andrena	intermedia	Thomson, 1870	Least Concern (LC) in Europe	https://www.gbif.org/species/1357894	Species listed in Rasmont et al. (2017)
Andrenidae	Andrena	labialis	(Kirby, 1802)	Data Deficient (DD) in Europe	https://www.gbif.org/species/1357222	Species listed in Rasmont et al. (2017)
Andrenidae	Andrena	lagopus	(Latreille, 1809)	Least Concern (LC) in Europe	https://www.gbif.org/species/1357100	Species record originates from this study
Andrenidae	Andrena	labiata	Fabricius, 1781	Data Deficient (DD) in Europe	https://www.gbif.org/species/1357207	Species listed in Rasmont et al. (2017)
Andrenidae	Andrena	lapponica	Zetterstedt, 1838	Least Concern (LC) in Europe	https://www.gbif.org/species/1357056	Species listed in Rasmont et al. (2017)
Andrenidae	Andrena	lathyri	Alfken, 1899	Data Deficient (DD) in Europe	https://www.gbif.org/species/1357026	Species listed in Rasmont et al. (2017)
Andrenidae	Andrena	limata	Smith, 1853	Data Deficient (DD) in Europe	https://www.gbif.org/species/1358095	Species listed in Rasmont et al. (2017)
Andrenidae	Andrena	marginata	Fabricius, 1776	Data Deficient (DD) in Europe	https://www.gbif.org/species/1357540	Species listed in Rasmont et al. (2017)
Andrenidae	Andrena	minutula	(Kirby, 1802)	Data Deficient (DD) in Europe	https://www.gbif.org/species/1357013	Species listed in Rasmont et al. (2017)
Andrenidae	Andrena	minutuloides	Perkins, 1914	Data Deficient (DD) in Europe	https://www.gbif.org/species/1356982	Species listed in Rasmont et al. (2017)
Andrenidae	Andrena	nana	(Kirby, 1802)	Least Concern (LC) in Europe	https://www.gbif.org/species/1358011	Species listed in Rasmont et al. (2017)
Andrenidae	Andrena	nigriceps	(Kirby, 1802)	Data Deficient (DD) in Europe	https://www.gbif.org/species/1357734	Species listed in Rasmont et al. (2017)
Andrenidae	Andrena	nigroaenea	(Kirby, 1802)	Least Concern (LC) in Europe	https://www.gbif.org/species/1357665	Species listed in Rasmont et al. (2017)
Andrenidae	Andrena	nigrospina	Thomson, 1872	Unkown	https://www.gbif.org/species/1357722	Species listed in Rasmont et al. (2017)	This species corresponds to the rarer of the two wild bees formerly merged as Andrena pilipes or Andrena carbonaria. https://www.bwars.com/bee/andrenidae/andrena-nigrospina
Andrenidae	Andrena	nitida	(Müller, 1776)	Least Concern (LC) in Europe	https://www.gbif.org/species/1357545	Species listed in Rasmont et al. (2017)
Andrenidae	Andrena	nitidiuscula	Schenck, 1853	Least Concern (LC) in Europe	https://www.gbif.org/species/1357495	Species listed in Rasmont et al. (2017)
Andrenidae	Andrena	nitidula	Pérez, 1903	Data Deficient (DD) in Europe	https://www.gbif.org/species/1357480	Species listed in Rasmont et al. (2017)
Andrenidae	Andrena	niveata	Friese, 1887	Data Deficient (DD) in Europe	https://www.gbif.org/species/1357466	Species listed in Rasmont et al. (2017)
Andrenidae	Andrena	nycthemera	Imhoff, 1868	Data Deficient (DD) in Europe	https://www.gbif.org/species/1357262	Species listed in Rasmont et al. (2017)
Andrenidae	Andrena	ovatula	(Kirby, 1802)	Near Threatened (NT) in Europe	https://www.gbif.org/species/1358376	Species listed in Rasmont et al. (2017)
Andrenidae	Andrena	pallitarsis	Pérez, 1903	Data Deficient (DD) in Europe	https://www.gbif.org/species/1358276	Species listed in Rasmont et al. (2017)
Andrenidae	Andrena	pandellei	Pérez, 1895	Least Concern (LC) in Europe	https://www.gbif.org/species/1358227	Species listed in Rasmont et al. (2017)
Andrenidae	Andrena	pilipes	Fabricius, 1781	Least Concern (LC) in Europe.	https://www.gbif.org/species/1357721	Species listed in Rasmont et al. (2017)	A. pilipes sensu stricto. This species is the most common of the two wild bees formerly merged as Andrena pilipes or Andrena carbonaria. https://www.bwars.com/bee/andrenidae/andrena-pilipes
Andrenidae	Andrena	polita	Smith, 1847	Least Concern (LC) in Europe	https://www.gbif.org/species/1357535	Species listed in Rasmont et al. (2017)
Andrenidae	Andrena	potentillae	Panzer, 1809	Data Deficient (DD) in Europe	https://www.gbif.org/species/1357487	Species listed in Rasmont et al. (2017)
Andrenidae	Andrena	praecox	(Scopoli, 1763)	Least Concern (LC) in Europe	https://www.gbif.org/species/1357456	Species listed in Rasmont et al. (2017)
Andrenidae	Andrena	propinqua	Schenck, 1853	Data Deficient (DD) in Europe	https://www.gbif.org/species/6096951	Species listed in Rasmont et al. (2017)
Andrenidae	Andrena	proxima	(Kirby, 1802)	Data Deficient (DD) in Europe	https://www.gbif.org/species/1357354	Species listed in Rasmont et al. (2017)
Andrenidae	Andrena	pusilla	Pérez, 1903	Data Deficient (DD) in Europe	https://www.gbif.org/species/1357043	Species listed in Rasmont et al. (2017)
Andrenidae	Andrena	rosae	Panzer, 1801	Data Deficient (DD) in Europe	https://www.gbif.org/species/1358094	Species listed in Rasmont et al. (2017)
Andrenidae	Andrena	ruficrus	Nylander, 1848	Least Concern (LC) in Europe	https://www.gbif.org/species/1357952	Species listed in Rasmont et al. (2017)
Andrenidae	Andrena	schencki	Morawitz, 1866	Data Deficient (DD) in Europe	https://www.gbif.org/species/1357402	Species listed in Rasmont et al. (2017)
Andrenidae	Andrena	semilaevis	Pérez, 1903	Data Deficient (DD) in Europe	https://www.gbif.org/species/1357074	Species listed in Rasmont et al. (2017)
Andrenidae	Andrena	similis	Smith, 1849	Data Deficient (DD) in Europe	https://www.gbif.org/species/1358254	Species listed in Rasmont et al. (2017)
Andrenidae	Andrena	simillima	Smith, 1851	Least Concern (LC) in Europe	https://www.gbif.org/species/1358236	Species listed in Rasmont et al. (2017)
Andrenidae	Andrena	spreta	Pérez, 1895	Data Deficient (DD) in Europe	https://www.gbif.org/species/1357881	Species listed in Rasmont et al. (2017)
Andrenidae	Andrena	strohmella	Illiger, 1806	Least Concern (LC) in Europe	https://www.gbif.org/species/1357634	Species listed in Rasmont et al. (2017)
Andrenidae	Andrena	subopaca	Nylander, 1848	Least Concern (LC) in Europe	https://www.gbif.org/species/1357479	Species listed in Rasmont et al. (2017)
Andrenidae	Andrena	synadelpha	Perkins, 1914	Data Deficient (DD) in Europe	https://www.gbif.org/species/1357230	Species listed in Rasmont et al. (2017)
Andrenidae	Andrena	tarsata	Nylander, 1848	Data Deficient (DD) in Europe	https://www.gbif.org/species/1357017	Species listed in Rasmont et al. (2017)
Andrenidae	Andrena	thoracica	(Fabricius, 1775)	Data Deficient (DD) in Europe	https://www.gbif.org/species/1358320	Species listed in Rasmont et al. (2017)
Andrenidae	Andrena	tibialis	(Kirby, 1802)	Least Concern (LC) in Europe	https://www.gbif.org/species/1358210	Species listed in Rasmont et al. (2017)
Andrenidae	Andrena	trimmerana	(Kirby, 1802)	Data Deficient (DD) in Europe	https://www.gbif.org/species/1357930	Species listed in Rasmont et al. (2017)
Andrenidae	Andrena	vaga	Panzer, 1799	Least Concern (LC) in Europe	https://www.gbif.org/species/1357486	Species listed in Rasmont et al. (2017)
Andrenidae	Andrena	varians	(Kirby, 1802)	Least Concern (LC) in Europe	https://www.gbif.org/species/1357397	Species listed in Rasmont et al. (2017)
Andrenidae	Andrena	ventralis	Imhoff, 1832	Data Deficient (DD) in Europe	https://www.gbif.org/species/1357310	Species listed in Rasmont et al. (2017)
Andrenidae	Andrena	viridescens	Viereck, 1916	Data Deficient (DD) in Europe	https://www.gbif.org/species/1357099	Species listed in Vereecken (2018)
Andrenidae	Andrena	wilkella	(Kirby, 1802)	Data Deficient (DD) in Europe	https://www.gbif.org/species/1358128	Species listed in Rasmont et al. (2017)
Andrenidae	Panurgus	banksianus	(Kirby, 1802)	Least Concern (LC) in Europe	https://www.gbif.org/species/1355948	Species listed in Rasmont et al. (2017)
Andrenidae	Panurgus	calcaratus	(Scopoli, 1763)	Least Concern (LC) in Europe	https://www.gbif.org/species/1355949	Species listed in Rasmont et al. (2017)
Andrenidae	Panurgus	dentipes	Latreille, 1811	Least Concern (LC) in Europe	https://www.gbif.org/species/1355929	Species listed in Rasmont et al. (2017)
Apidae	Amegilla	quadrifasciata	(de Villers, 1789)	Least Concern (LC) in Europe	https://www.gbif.org/species/1340000	Species listed in Rasmont et al. (2017)
Apidae	Ammobates	punctatus	(Fabricius, 1804)	Least Concern (LC) in Europe	https://www.gbif.org/species/5039552	Species listed in Rasmont et al. (2017)
Apidae	Anthophora	aestivalis	(Panzer, 1801)	Least Concern (LC) in Europe	https://www.gbif.org/species/1344360	Species listed in Rasmont et al. (2017)
Apidae	Anthophora	furcata	(Panzer, 1798)	Least Concern (LC) in Europe	https://www.gbif.org/species/1344341	Species listed in Vereecken (2018)
Apidae	Anthophora	plagiata	(Illiger, 1806)	Least Concern (LC) in Europe	https://www.gbif.org/species/1344121	Species listed in Rasmont et al. (2017)
Apidae	Anthophora	plumipes	(Pallas, 1772)	Least Concern (LC) in Europe	https://www.gbif.org/species/1344087	Species listed in Rasmont et al. (2017)
Apidae	Anthophora	quadrimaculata	(Panzer, 1798)	Data Deficient (DD) in Europe	https://www.gbif.org/species/1344362	Species listed in Rasmont et al. (2017)
Apidae	Anthophora	retusa	(Linnaeus, 1758)	Least Concern (LC) in Europe	https://www.gbif.org/species/1344337	Species listed in Rasmont et al. (2017)
Apidae	Biastes	truncatus	(Nylander, 1848)	Vulnerable (VU) in Europe	https://www.gbif.org/species/5039606	Species listed in Rasmont et al. (2017)
Apidae	Bombus	barbutellus	(Kirby, 1802)	Least Concern (LC) in Europe	https://www.gbif.org/species/1340434	Species listed in Vereecken (2018)
Apidae	Bombus	bohemicus	Seidl, 1838	Least Concern (LC) in Europe	https://www.gbif.org/species/1340362	Species listed in Rasmont et al. (2017)
Apidae	Bombus	campestris	(Panzer, 1801)	Least Concern (LC) in Europe	https://www.gbif.org/species/1340527	Species listed in Rasmont et al. (2017)
Apidae	Bombus	confusus	Schenck, 1861	Vulnerable (VU) in Europe	https://www.gbif.org/species/1340477	Species listed in Vereecken (2018)
Apidae	Bombus	cryptarum	(Fabricius, 1775)	Least Concern (LC) in Europe	https://www.gbif.org/species/5870368	Species listed in Rasmont et al. (2017)
Apidae	Bombus	hortorum	(Linnaeus, 1761)	Least Concern (LC) in Europe	https://www.gbif.org/species/1340542	Species listed in Rasmont et al. (2017)
Apidae	Bombus	humilis	Illiger, 1806	Least Concern (LC) in Europe	https://www.gbif.org/species/1340523	Species listed in Rasmont et al. (2017)
Apidae	Bombus	hypnorum	(Linnaeus, 1758)	Least Concern (LC) in Europe	https://www.gbif.org/species/1340513	Species listed in Rasmont et al. (2017)
Apidae	Bombus	lapidarius	(Linnaeus, 1758)	Least Concern (LC) in Europe	https://www.gbif.org/species/1340301	Species listed in Rasmont et al. (2017)
Apidae	Bombus	lucorum	(Linnaeus, 1761)	Least Concern (LC) in Europe	https://www.gbif.org/species/1340298	Species listed in Rasmont et al. (2017)
Apidae	Bombus	norvegicus	(Sparre-Schneider, 1918)	Least Concern (LC) in Europe	https://www.gbif.org/species/1340506	Species listed in Rasmont et al. (2017)
Apidae	Bombus	pascuorum	(Scopoli, 1763)	Least Concern (LC) in Europe	https://www.gbif.org/species/1340405	Species listed in Rasmont et al. (2017)
Apidae	Bombus	pratorum	(Linnaeus, 1761)	Least Concern (LC) in Europe	https://www.gbif.org/species/1340305	Species listed in Rasmont et al. (2017)
Apidae	Bombus	ruderarius	(Müller, 1776)	Least Concern (LC) in Europe	https://www.gbif.org/species/1340394	Species listed in Rasmont et al. (2017)
Apidae	Bombus	rupestris	(Fabricius, 1793)	Least Concern (LC) in Europe	https://www.gbif.org/species/1340344	Species listed in Rasmont et al. (2017)
Apidae	Bombus	soroeensis	(Fabricius, 1776)	Least Concern (LC) in Europe	https://www.gbif.org/species/1340444	Species listed in Vereecken (2018)
Apidae	Bombus	subterraneus	(Linnaeus, 1758)	Least Concern (LC) in Europe	https://www.gbif.org/species/1340422	Species listed in Vereecken (2018)
Apidae	Bombus	sylvarum	(Linnaeus, 1761)	Least Concern (LC) in Europe	https://www.gbif.org/species/1340342	Species listed in Rasmont et al. (2017)
Apidae	Bombus	sylvestris	(Lepeletier, 1832)	Least Concern (LC) in Europe	https://www.gbif.org/species/1340333	Species listed in Rasmont et al. (2017)
Apidae	Bombus	terrestris	(Linnaeus, 1758)	Least Concern (LC) in Europe	https://www.gbif.org/species/1340503	Species listed in Rasmont et al. (2017)
Apidae	Bombus	vestalis	(Geoffroy, 1785)	Least Concern (LC) in Europe	https://www.gbif.org/species/1340418	Species listed in Vereecken (2018)
Apidae	Bombus	veteranus	(Fabricius, 1793)	Least Concern (LC) in Europe	https://www.gbif.org/species/1340387	Species listed in Vereecken (2018)
Apidae	Ceratina	cucurbitina	(Rossi, 1792)	Least Concern (LC) in Europe	https://www.gbif.org/species/5039868	Species listed in Rasmont et al. (2017)
Apidae	Ceratina	cyanea	(Kirby, 1802)	Least Concern (LC) in Europe	https://www.gbif.org/species/5039824	Species listed in Rasmont et al. (2017)
Apidae	Epeoloides	coecutiens	(Fabricius, 1775)	Least Concern (LC) in Europe	https://www.gbif.org/species/1341850	Species listed in Rasmont et al. (2017)
Apidae	Epeolus	cruciger	(Panzer, 1799)	Near Threatened (NT) in Europe	https://www.gbif.org/species/1341892	Species listed in Rasmont et al. (2017)
Apidae	Epeolus	variegatus	(Linnaeus, 1758)	Least Concern (LC) in Europe	https://www.gbif.org/species/1341940	Species listed in Rasmont et al. (2017)
Apidae	Eucera	alticincta	(Lepeletier, 1841)	Least Concern (LC) in Europe	https://www.gbif.org/species/9417291	Species described in Weigand and Herrera-Mesías (2020)
Apidae	Eucera	longicornis	(Linnaeus, 1758)	Least Concern (LC) in Europe	https://www.gbif.org/species/1340884	Species listed in Rasmont et al. (2017)
Apidae	Eucera	nigrescens	Pérez, 1879	Least Concern (LC) in Europe	https://www.gbif.org/species/1340969	Species listed in Rasmont et al. (2017)
Apidae	Melecta	albifrons	(Forster, 1771)	Least Concern (LC) in Europe	https://www.gbif.org/species/1345296	Species listed in Rasmont et al. (2017)
Apidae	Melecta	luctuosa	(Scopoli, 1770)	Least Concern (LC) in Europe	https://www.gbif.org/species/1345319	Species listed in Rasmont et al. (2017)
Apidae	Nomada	alboguttata	Herrich-Schäffer, 1839	Least Concern (LC) in Europe	https://www.gbif.org/species/1343792	Species listed in Rasmont et al. (2017)
Apidae	Nomada	armata	Herrich-Schäffer, 1839	Near Threatened (NT) in Europe	https://www.gbif.org/species/1343523	Species listed in Rasmont et al. (2017)
Apidae	Nomada	bifasciata	Olivier, 1811	Least Concern (LC) in Europe	https://www.gbif.org/species/1343892	Species listed in Rasmont et al. (2017)
Apidae	Nomada	braunsiana	Schmiedeknecht, 1882	Near Threatened (NT) in Europe	https://www.gbif.org/species/1343728	Species listed in Rasmont et al. (2017)
Apidae	Nomada	castellana	Dusmet y Alonso, 1913	Least Concern (LC) in Europe	https://www.gbif.org/species/1343557	Species listed in Rasmont et al. (2017)
Apidae	Nomada	conjungens	Herrich-Schäffer, 1839	Least Concern (LC) in Europe	https://www.gbif.org/species/1343331	Species listed in Rasmont et al. (2017)
Apidae	Nomada	distinguenda	Morawitz, 1874	Least Concern (LC) in Europe	https://www.gbif.org/species/1343736	Species listed in Vereecken (2018)
Apidae	Nomada	fabriciana	(Linnaeus, 1767)	Least Concern (LC) in Europe	https://www.gbif.org/species/1343441	Species listed in Rasmont et al. (2017)
Apidae	Nomada	facilis	Schwarz, 1967	Least Concern (LC) in Europe	https://www.gbif.org/species/1343416	Species listed in Rasmont et al. (2017)
Apidae	Nomada	ferruginata	(Linnaeus, 1767)	Least Concern (LC) in Europe	https://www.gbif.org/species/1343309	Species listed in Rasmont et al. (2017)
Apidae	Nomada	flava	Panzer, 1798	Least Concern (LC) in Europe	https://www.gbif.org/species/1343896	Species listed in Rasmont et al. (2017)
Apidae	Nomada	flavoguttata	(Kirby, 1802)	Least Concern (LC) in Europe	https://www.gbif.org/species/1344004	Species listed in Rasmont et al. (2017)
Apidae	Nomada	flavopicta	(Kirby, 1802)	Least Concern (LC) in Europe	https://www.gbif.org/species/1343989	Species listed in Rasmont et al. (2017)
Apidae	Nomada	fucata	Panzer, 1798	Least Concern (LC) in Europe	https://www.gbif.org/species/1343957	Species listed in Rasmont et al. (2017)
Apidae	Nomada	fulvicornis	Fabricius, 1793	Least Concern (LC) in Europe	https://www.gbif.org/species/1343909	Species listed in Rasmont et al. (2017)
Apidae	Nomada	furva	(Panzer, 1798)	Data Deficient (DD) in Europe	https://www.gbif.org/species/1343893	Species record originates from this study
Apidae	Nomada	fuscicornis	Nylander, 1848	Least Concern (LC) in Europe	https://www.gbif.org/species/1343831	Species listed in Rasmont et al. (2017)
Apidae	Nomada	goodeniana	(Kirby, 1802)	Least Concern (LC) in Europe	https://www.gbif.org/species/1343694	Species listed in Rasmont et al. (2017)
Apidae	Nomada	insignipes	Schmiedeknecht, 1882	Least Concern (LC) in Europe	https://www.gbif.org/species/1343853	Species listed in Rasmont et al. (2017)
Apidae	Nomada	integra	Brullé, 1832	Least Concern (LC) in Europe	https://www.gbif.org/species/1343808	Species listed in Vereecken (2018)
Apidae	Nomada	lathburiana	(Kirby, 1802)	Least Concern (LC) in Europe	https://www.gbif.org/species/1343389	Species listed in Rasmont et al. (2017)
Apidae	Nomada	leucophthalma	(Kirby, 1802)	Least Concern (LC) in Europe	https://www.gbif.org/species/1343697	Species listed in Rasmont et al. (2017)
Apidae	Nomada	marshamella	(Kirby, 1802)	Least Concern (LC) in Europe	https://www.gbif.org/species/1343878	Species listed in Rasmont et al. (2017)
Apidae	Nomada	melathoracica	Imhoff, 1834	Least Concern (LC) in Europe	https://www.gbif.org/species/1343800	Species listed in Rasmont et al. (2017)
Apidae	Nomada	obscura	Zetterstedt, 1838	Least Concern (LC) in Europe	https://www.gbif.org/species/1343303	Species listed in Rasmont et al. (2017)
Apidae	Nomada	obtusifrons	Nylander, 1848	Near Threatened (NT) in Europe	https://www.gbif.org/species/1343247	Species listed in Rasmont et al. (2017)
Apidae	Nomada	panzeri	Lepeletier, 1841	Least Concern (LC) in Europe	https://www.gbif.org/species/1343704	Species listed in Rasmont et al. (2017)
Apidae	Nomada	rhenana	Morawitz, 1872	Near Threatened (NT) in Europe	https://www.gbif.org/species/1343847	Species listed in Rasmont et al. (2017)
Apidae	Nomada	ruficornis	(Linnaeus, 1758)	Least Concern (LC) in Europe	https://www.gbif.org/species/1343608	Species listed in Rasmont et al. (2017)
Apidae	Nomada	rufipes	Fabricius, 1793	Least Concern (LC) in Europe	https://www.gbif.org/species/1343593	Species listed in Rasmont et al. (2017)
Apidae	Nomada	sexfasciata	(Panzer, 1799)	Least Concern (LC) in Europe	https://www.gbif.org/species/1343381	Species record originates from this study
Apidae	Nomada	sheppardana	(Kirby, 1802)	Least Concern (LC) in Europe	https://www.gbif.org/species/1343367	Species listed in Rasmont et al. (2017)
Apidae	Nomada	signata	Jurine, 1807	Least Concern (LC) in Europe	https://www.gbif.org/species/1343261	Species listed in Rasmont et al. (2017)
Apidae	Nomada	stigma	Fabricius, 1804	Least Concern (LC) in Europe	https://www.gbif.org/species/1343922	Species listed in Rasmont et al. (2017)
Apidae	Nomada	striata	Fabricius, 1793	Least Concern (LC) in Europe	https://www.gbif.org/species/1343885	Species listed in Rasmont et al. (2017)
Apidae	Nomada	succincta	Panzer, 1798	Least Concern (LC) in Europe	https://www.gbif.org/species/1343826	Species listed in Rasmont et al. (2017)
Apidae	Nomada	zonata	Panzer, 1798	Least Concern (LC) in Europe	https://www.gbif.org/species/1343298	Species listed in Rasmont et al. (2017)
Apidae	Thyreus	orbatus	(Lepeletier, 1841)	Least Concern (LC) in Europe	https://www.gbif.org/species/1344902	Species listed in Rasmont et al. (2017)
Apidae	Xylocopa	violacea	(Linnaeus, 1758)	Least Concern (LC) in Europe	https://www.gbif.org/species/1342108	Species listed in Rasmont et al. (2017)
Colletidae	Colletes	cunicularius	(Linnaeus, 1761)	Least Concern (LC) in Europe	https://www.gbif.org/species/1348691	Species listed in Rasmont et al. (2017)
Colletidae	Colletes	daviesanus	Smith, 1846	Least Concern (LC) in Europe	https://www.gbif.org/species/1348620	Species listed in Rasmont et al. (2017)
Colletidae	Colletes	floralis	Eversmann, 1852	Vulnerable (VU) in Europe	https://www.gbif.org/species/1348742	Species listed in Rasmont et al. (2017)
Colletidae	Colletes	hederae	Schmidt & Westrich, 1993	Least Concern (LC) in Europe	https://www.gbif.org/species/1348914	Species listed in Rasmont et al. (2017)
Colletidae	Colletes	impunctatus	Nylander, 1852	Vulnerable (VU) in Europe	https://www.gbif.org/species/1348624	Species listed in Rasmont et al. (2017)
Colletidae	Colletes	similis	Schenck, 1853	Least Concern (LC) in Europe	https://www.gbif.org/species/1348950	Species listed in Rasmont et al. (2017)
Colletidae	Colletes	succinctus	(Linnaeus, 1785)	Near Threatened (NT) in Europe	https://www.gbif.org/species/1348704	Species listed in Rasmont et al. (2017)
Colletidae	Hylaeus	angustatus	(Schenck, 1861)	Least Concern (LC) in Europe	https://www.gbif.org/species/1349822	Species listed in Rasmont et al. (2017)
Colletidae	Hylaeus	annularis	(Kirby, 1802)	Data Deficient (DD) in Europe	https://www.gbif.org/species/1349884	Species listed in Rasmont et al. (2017)
Colletidae	Hylaeus	annulatus	(Linnaeus, 1758)	Data Deficient (DD) in Europe	https://www.gbif.org/species/1350053	Species listed in Rasmont et al. (2017)
Colletidae	Hylaeus	brevicornis	Nylander, 1852	Least Concern (LC) in Europe	https://www.gbif.org/species/1349560	Species listed in Rasmont et al. (2017)
Colletidae	Hylaeus	clypearis	(Schenck, 1853)	Least Concern (LC) in Europe	https://www.gbif.org/species/1349838	Species listed in Rasmont et al. (2017)
Colletidae	Hylaeus	communis	Nylander, 1852	Least Concern (LC) in Europe	https://www.gbif.org/species/1349795	Species listed in Rasmont et al. (2017)
Colletidae	Hylaeus	confusus	Nylander, 1852	Least Concern (LC) in Europe	https://www.gbif.org/species/1349755	Species listed in Rasmont et al. (2017)
Colletidae	Hylaeus	cornutus	Curtis, 1831	Least Concern (LC) in Europe	https://www.gbif.org/species/1349619	Species listed in Rasmont et al. (2017)
Colletidae	Hylaeus	crassanus	(Warncke, 1972)	Near Threatened (NT) in Europe	https://www.gbif.org/species/1349527	Species listed in Rasmont et al. (2017)
Colletidae	Hylaeus	difformis	(Eversmann, 1852)	Least Concern (LC) in Europe	https://www.gbif.org/species/1349802	Species listed in Rasmont et al. (2017)
Colletidae	Hylaeus	gibbus	Saunders, 1850	Least Concern (LC) in Europe	https://www.gbif.org/species/1349447	Species listed in Rasmont et al. (2017)
Colletidae	Hylaeus	gredleri	Förster, 1871	Least Concern (LC) in Europe	https://www.gbif.org/species/1350025	Species listed in Rasmont et al. (2017)
Colletidae	Hylaeus	hyalinatus	Smith, 1842	Least Concern (LC) in Europe	https://www.gbif.org/species/1349638	Species listed in Rasmont et al. (2017)
Colletidae	Hylaeus	kahri	Förster, 1871	Data Deficient (DD) in Europe	https://www.gbif.org/species/1349757	Species listed in Rasmont et al. (2017)
Colletidae	Hylaeus	leptocephalus	(Morawitz, 1870)	Least Concern (LC) in Europe	https://www.gbif.org/species/1349573	Species listed in Rasmont et al. (2017)
Colletidae	Hylaeus	nigritus	(Fabricius, 1798)	Least Concern (LC) in Europe	https://www.gbif.org/species/1349433	Species listed in Rasmont et al. (2017)
Colletidae	Hylaeus	pectoralis	Förster, 1871	Data Deficient (DD) in Europe	https://www.gbif.org/species/1349550	Species listed in Rasmont et al. (2017)
Colletidae	Hylaeus	pictipes	Nylander, 1852	Least Concern (LC) in Europe	https://www.gbif.org/species/1349889	Species listed in Rasmont et al. (2017)
Colletidae	Hylaeus	punctatus	(Brullé, 1832)	Least Concern (LC) in Europe	https://www.gbif.org/species/1350002	Species listed in Rasmont et al. (2017)
Colletidae	Hylaeus	punctulatissimus	Smith, 1842	Data Deficient (DD) in Europe	https://www.gbif.org/species/1349475	Species listed in Rasmont et al. (2017)
Colletidae	Hylaeus	signatus	(Panzer, 1798)	Least Concern (LC) in Europe	https://www.gbif.org/species/1349904	Species listed in Rasmont et al. (2017)
Colletidae	Hylaeus	variegatus	(Fabricius, 1798)	Least Concern (LC) in Europe	https://www.gbif.org/species/1349484	Species listed in Rasmont et al. (2017)
Halictidae	Dufourea	dentiventris	(Nylander, 1848)	Near Threatened (NT) in Europe	https://www.gbif.org/species/1351938	Species listed in Rasmont et al. (2017)
Halictidae	Dufourea	minuta	Lepeletier, 1841	Near Threatened (NT) in Europe	https://www.gbif.org/species/1351974	Species listed in Rasmont et al. (2017)
Halictidae	Halictus	compressus	(Walckenaer, 1802)	Least Concern (LC) in Europe	https://www.gbif.org/species/1353390	Species listed in Rasmont et al. (2017)
Halictidae	Halictus	confusus	Smith, 1853	Least Concern (LC) in Europe	https://www.gbif.org/species/1353363	Species listed in Rasmont et al. (2017)
Halictidae	Halictus	langobardicus	Blüthgen, 1944	Least Concern (LC) in Europe	https://www.gbif.org/species/1353227	Species listed in Rasmont et al. (2017)
Halictidae	Halictus	maculatus	Smith, 1848	Least Concern (LC) in Europe	https://www.gbif.org/species/1353364	Species listed in Rasmont et al. (2017)
Halictidae	Halictus	rubicundus	(Christ, 1791)	Least Concern (LC) in Europe	https://www.gbif.org/species/1353453	Species listed in Rasmont et al. (2017)
Halictidae	Halictus	scabiosae	(Rossi, 1790)	Least Concern (LC) in Europe	https://www.gbif.org/species/1353395	Species listed in Rasmont et al. (2017)
Halictidae	Halictus	sexcinctus	(Fabricius, 1775)	Least Concern (LC) in Europe	https://www.gbif.org/species/1353322	Species listed in Rasmont et al. (2017)
Halictidae	Halictus	simplex	Blüthgen, 1923	Least Concern (LC) in Europe	https://www.gbif.org/species/1353310	Species listed in Rasmont et al. (2017)
Halictidae	Lasioglossum	aeratum	(Kirby, 1802)	Least Concern (LC) in Europe	https://www.gbif.org/species/1355135	Species listed in Rasmont et al. (2017)
Halictidae	Lasioglossum	albipes	(Fabricius, 1781)	Least Concern (LC) in Europe	https://www.gbif.org/species/1354990	Species listed in Rasmont et al. (2017)
Halictidae	Lasioglossum	brevicorne	(Schenck, 1868)	Near Threatened (NT) in Europe	https://www.gbif.org/species/1354819	Species listed in Rasmont et al. (2017)
Halictidae	Lasioglossum	calceatum	(Scopoli, 1763)	Least Concern (LC) in Europe	https://www.gbif.org/species/1354476	Species listed in Rasmont et al. (2017)
Halictidae	Lasioglossum	costulatum	(Kriechbaumer, 1873)	Near Threatened (NT) in Europe	https://www.gbif.org/species/1354961	Species listed in Rasmont et al. (2017)
Halictidae	Lasioglossum	fratellum	(Pérez, 1903)	Least Concern (LC) in Europe	https://www.gbif.org/species/1354773	Species listed in Rasmont et al. (2017)
Halictidae	Lasioglossum	fulvicorne	(Kirby, 1802)	Least Concern (LC) in Europe	https://www.gbif.org/species/1354651	Species listed in Rasmont et al. (2017)
Halictidae	Lasioglossum	glabriusculum	(Morawitz, 1872)	Least Concern (LC) in Europe	https://www.gbif.org/species/1354397	Species listed in Rasmont et al. (2017)
Halictidae	Lasioglossum	intermedium	(Schenck, 1868)	Near Threatened (NT) in Europe	https://www.gbif.org/species/1354874	Species listed in Rasmont et al. (2017)
Halictidae	Lasioglossum	interruptum	(Panzer, 1798)	Least Concern (LC) in Europe	https://www.gbif.org/species/1354864	Species listed in Rasmont et al. (2017)
Halictidae	Lasioglossum	laevigatum	(Kirby, 1802)	Near Threatened (NT) in Europe	https://www.gbif.org/species/1354272	Species listed in Rasmont et al. (2017)
Halictidae	Lasioglossum	laticeps	(Schenck, 1868)	Least Concern (LC) in Europe	https://www.gbif.org/species/1354102	Species listed in Rasmont et al. (2017)
Halictidae	Lasioglossum	lativentre	(Schenck, 1853)	Least Concern (LC) in Europe	https://www.gbif.org/species/1354007	Species listed in Rasmont et al. (2017)
Halictidae	Lasioglossum	leucopus	(Kirby, 1802)	Least Concern (LC) in Europe	https://www.gbif.org/species/1353834	Species listed in Rasmont et al. (2017)
Halictidae	Lasioglossum	leucozonium	(Schrank, 1781)	Least Concern (LC) in Europe	https://www.gbif.org/species/1353805	Species listed in Rasmont et al. (2017)
Halictidae	Lasioglossum	limbellum	(Morawitz, 1876)	Data Deficient (DD) in Europe	https://www.gbif.org/species/1353715	Species listed in Rasmont et al. (2017)
Halictidae	Lasioglossum	lineare	(Schenck, 1868)	Data Deficient (DD) in Europe	https://www.gbif.org/species/1353697	Species listed in Rasmont et al. (2017)
Halictidae	Lasioglossum	lissonotum	(Noskiewicz, 1926)	Data Deficient (DD) in Europe	https://www.gbif.org/species/1353626	Species listed in Rasmont et al. (2017)
Halictidae	Lasioglossum	lucidulum	(Schenck, 1861)	Least Concern (LC) in Europe	https://www.gbif.org/species/1355330	Species listed in Rasmont et al. (2017)
Halictidae	Lasioglossum	majus	(Nylander, 1852)	Near Threatened (NT) in Europe	https://www.gbif.org/species/1355095	Species listed in Vereecken (2018)
Halictidae	Lasioglossum	malachurum	(Kirby, 1802)	Least Concern (LC) in Europe	https://www.gbif.org/species/1355085	Species listed in Rasmont et al. (2017)
Halictidae	Lasioglossum	minutissimum	(Kirby, 1802)	Least Concern (LC) in Europe	https://www.gbif.org/species/1354422	Species listed in Rasmont et al. (2017)
Halictidae	Lasioglossum	minutulum	(Schenck, 1853)	Near Threatened (NT) in Europe	https://www.gbif.org/species/1354398	Species listed in Rasmont et al. (2017)
Halictidae	Lasioglossum	morio	(Fabricius, 1793)	Least Concern (LC) in Europe	https://www.gbif.org/species/1354206	Species listed in Rasmont et al. (2017)
Halictidae	Lasioglossum	nitidiusculum	(Kirby, 1802)	Least Concern (LC) in Europe	https://www.gbif.org/species/1353610	Species listed in Rasmont et al. (2017)
Halictidae	Lasioglossum	nitidulum	(Fabricius, 1804)	Least Concern (LC) in Europe	https://www.gbif.org/species/1353593	Species listed in Rasmont et al. (2017)
Halictidae	Lasioglossum	parvulum	(Schenck, 1853)	Least Concern (LC) in Europe	https://www.gbif.org/species/1354342	Species listed in Rasmont et al. (2017)
Halictidae	Lasioglossum	pauxillum	(Schenck, 1853)	Least Concern (LC) in Europe	https://www.gbif.org/species/1354263	Species listed in Rasmont et al. (2017)
Halictidae	Lasioglossum	punctatissimum	(Schenck, 1853)	Least Concern (LC) in Europe	https://www.gbif.org/species/1354742	Species listed in Rasmont et al. (2017)
Halictidae	Lasioglossum	puncticolle	(Morawitz, 1872)	Least Concern (LC) in Europe	https://www.gbif.org/species/1354699	Species listed in Rasmont et al. (2017)
Halictidae	Lasioglossum	quadrinotatulum	(Schenck, 1861)	Near Threatened (NT) in Europe	https://www.gbif.org/species/1354623	Species listed in Rasmont et al. (2017)
Halictidae	Lasioglossum	quadrinotatum	(Kirby, 1802)	Near Threatened (NT) in Europe	https://www.gbif.org/species/1354607	Species listed in Rasmont et al. (2017)
Halictidae	Lasioglossum	rufitarse	(Zetterstedt, 1838)	Least Concern (LC) in Europe	https://www.gbif.org/species/1354058	Species listed in Rasmont et al. (2017)
Halictidae	Lasioglossum	semilucens	(Alfken, 1914)	Least Concern (LC) in Europe	https://www.gbif.org/species/1355126	Species listed in Rasmont et al. (2017)
Halictidae	Lasioglossum	sexnotatum	(Kirby, 1802)	Near Threatened (NT) in Europe	https://www.gbif.org/species/1354966	Species listed in Rasmont et al. (2017)
Halictidae	Lasioglossum	sexstrigatum	(Schenck, 1868)	Least Concern (LC) in Europe	https://www.gbif.org/species/1354952	Species listed in Rasmont et al. (2017)
Halictidae	Lasioglossum	smeathmanellum	(Kirby, 1802)	Least Concern (LC) in Europe	https://www.gbif.org/species/1354656	Species listed in Rasmont et al. (2017)
Halictidae	Lasioglossum	subhirtum	(Lepeletier, 1841)	Least Concern (LC) in Europe	https://www.gbif.org/species/1353981	Species listed in Rasmont et al. (2017)
Halictidae	Lasioglossum	tricinctum	(Schenck, 1874)	Data Deficient (DD) in Europe	https://www.gbif.org/species/1354676	Species listed in Rasmont et al. (2017)
Halictidae	Lasioglossum	villosulum	(Kirby, 1802)	Least Concern (LC) in Europe	https://www.gbif.org/species/1354041	Species listed in Rasmont et al. (2017)
Halictidae	Lasioglossum	xanthopus	(Kirby, 1802)	Near Threatened (NT) in Europe	https://www.gbif.org/species/1353731	Species listed in Rasmont et al. (2017)
Halictidae	Lasioglossum	zonulum	(Smith, 1848)	Least Concern (LC) in Europe	https://www.gbif.org/species/1355337	Species listed in Rasmont et al. (2017)
Halictidae	Rhophitoides	canus	(Eversmann, 1852)	Least Concern (LC) in Europe	https://www.gbif.org/species/9445413	Species listed in Rasmont et al. (2017)
Halictidae	Seladonia	subaurata	(Rossi, 1792)	Least Concern (LC) in Europe	https://www.gbif.org/species/10189950	Species listed in Rasmont et al. (2017)
Halictidae	Seladonia	tumulorum	(Linnaeus, 1758)	Least Concern (LC) in Europe	https://www.gbif.org/species/10586252	Species listed in Rasmont et al. (2017)
Halictidae	Sphecodes	albilabris	(Fabricius, 1793)	Least Concern (LC) in Europe	https://www.gbif.org/species/1351582	Species listed in Rasmont et al. (2017)
Halictidae	Sphecodes	crassus	Thomson, 1870	Least Concern (LC) in Europe	https://www.gbif.org/species/1351387	Species listed in Rasmont et al. (2017)
Halictidae	Sphecodes	ephippius	(Linnaeus, 1767)	Least Concern (LC) in Europe	https://www.gbif.org/species/1351470	Species listed in Rasmont et al. (2017)
Halictidae	Sphecodes	ferruginatus	Hagens, 1882	Least Concern (LC) in Europe	https://www.gbif.org/species/1351360	Species listed in Rasmont et al. (2017)
Halictidae	Sphecodes	geoffrellus	(Kirby, 1802)	Least Concern (LC) in Europe	https://www.gbif.org/species/5042560	Species listed in Rasmont et al. (2017)
Halictidae	Sphecodes	gibbus	(Linnaeus, 1758)	Least Concern (LC) in Europe	https://www.gbif.org/species/1351491	Species listed in Rasmont et al. (2017)
Halictidae	Sphecodes	hyalinatus	Hagens, 1882	Near Threatened (NT) in Europe	https://www.gbif.org/species/1351574	Species listed in Rasmont et al. (2017)
Halictidae	Sphecodes	longulus	Hagens, 1882	Least Concern (LC) in Europe	https://www.gbif.org/species/1351335	Species listed in Rasmont et al. (2017)
Halictidae	Sphecodes	majalis	(Pérez, 1903)	Near Threatened (NT) in Europe	https://www.gbif.org/species/1351577	Species record originates from this study
Halictidae	Sphecodes	marginatus	Hagens, 1882	Least Concern (LC) in Europe	https://www.gbif.org/species/1351467	Species listed in Rasmont et al. (2017)
Halictidae	Sphecodes	miniatus	Hagens, 1882	Least Concern (LC) in Europe	https://www.gbif.org/species/1351330	Species listed in Rasmont et al. (2017)
Halictidae	Sphecodes	monilicornis	(Kirby, 1802)	Least Concern (LC) in Europe	https://www.gbif.org/species/1351304	Species listed in Rasmont et al. (2017)
Halictidae	Sphecodes	niger	Hagens, 1874	Least Concern (LC) in Europe	https://www.gbif.org/species/1351513	Species listed in Vereecken (2018)
Halictidae	Sphecodes	pellucidus	Smith, 1845	Least Concern (LC) in Europe	https://www.gbif.org/species/1351446	Species listed in Rasmont et al. (2017)
Halictidae	Sphecodes	pseudofasciatus	Blüthgen, 1925	Data Deficient (DD) in Europe	https://www.gbif.org/species/1351518	Species listed in Vereecken (2018)
Halictidae	Sphecodes	puncticeps	Thomson, 1870	Least Concern (LC) in Europe	https://www.gbif.org/species/1351481	Species listed in Rasmont et al. (2017)
Halictidae	Sphecodes	reticulatus	Thomson, 1870	Least Concern (LC) in Europe	https://www.gbif.org/species/1351332	Species listed in Rasmont et al. (2017)
Halictidae	Sphecodes	rubicundus	Hagens, 1875	Near Threatened (NT) in Europe	https://www.gbif.org/species/1351576	Species listed in Rasmont et al. (2017)
Halictidae	Sphecodes	ruficrus	(Erichson, 1835)	Least Concern (LC) in Europe	https://www.gbif.org/species/1351540	Species listed in Rasmont et al. (2017)
Halictidae	Sphecodes	rufiventris	(Panzer, 1798)	Least Concern (LC) in Europe	https://www.gbif.org/species/1351503	Species listed in Rasmont et al. (2017)
Halictidae	Sphecodes	scabricollis	Wesmael, 1835	Data Deficient (DD) in Europe	https://www.gbif.org/species/1351392	Species listed in Rasmont et al. (2017)
Halictidae	Sphecodes	spinulosus	Hagens, 1875	Near Threatened (NT) in Europe	https://www.gbif.org/species/1351462	Species listed in Rasmont et al. (2017)
Megachilidae	Anthidiellum	strigatum	(Panzer, 1805)	Least Concern (LC) in Europe	https://www.gbif.org/species/1338883	Species listed in Rasmont et al. (2017)
Megachilidae	Anthidium	manicatum	(Linnaeus, 1758)	Least Concern (LC) in Europe	https://www.gbif.org/species/1334821	Species listed in Rasmont et al. (2017)
Megachilidae	Anthidium	oblongatum	(Illiger, 1806)	Least Concern (LC) in Europe	https://www.gbif.org/species/1334902	Species listed in Rasmont et al. (2017)
Megachilidae	Anthidium	punctatum	Latreille, 1809	Least Concern (LC) in Europe	https://www.gbif.org/species/1334817	Species listed in Rasmont et al. (2017)
Megachilidae	Chelostoma	campanularum	(Kirby, 1802)	Least Concern (LC) in Europe	https://www.gbif.org/species/1334499	Species listed in Rasmont et al. (2017)
Megachilidae	Chelostoma	distinctum	(Stoeckhert, 1929)	Least Concern (LC) in Europe	https://www.gbif.org/species/1334501	Species listed in Rasmont et al. (2017)
Megachilidae	Chelostoma	florisomne	(Linnaeus, 1758)	Least Concern (LC) in Europe	https://www.gbif.org/species/1334527	Species listed in Rasmont et al. (2017)
Megachilidae	Chelostoma	rapunculi	(Lepeletier, 1841)	Least Concern (LC) in Europe	https://www.gbif.org/species/1334493	Species listed in Rasmont et al. (2017)
Megachilidae	Coelioxys	afra	Lepeletier, 1841	Least Concern (LC) in Europe	https://www.gbif.org/species/1338498	Species listed in Rasmont et al. (2017)
Megachilidae	Coelioxys	aurolimbata	Förster, 1853	Least Concern (LC) in Europe	https://www.gbif.org/species/1338640	Species listed in Rasmont et al. (2017)
Megachilidae	Coelioxys	conoidea	(Illiger, 1806)	Least Concern (LC) in Europe	https://www.gbif.org/species/1338425	Species listed in Rasmont et al. (2017)
Megachilidae	Coelioxys	inermis	(Kirby, 1802)	Least Concern (LC) in Europe	https://www.gbif.org/species/1338677	Species listed in Rasmont et al. (2017)
Megachilidae	Coelioxys	mandibularis	Nylander, 1848	Least Concern (LC) in Europe	https://www.gbif.org/species/1338626	Species listed in Rasmont et al. (2017)
Megachilidae	Coelioxys	quadridentata	(Linnaeus, 1758)	Least Concern (LC) in Europe	https://www.gbif.org/species/1338639	Species listed in Rasmont et al. (2017)
Megachilidae	Coelioxys	rufescens	Lepeletier & Audinet-Serville, 1825	Least Concern (LC) in Europe	https://www.gbif.org/species/1338348	Species listed in Rasmont et al. (2017)
Megachilidae	Dioxys	tridentata	(Nylander, 1848)	Least Concern (LC) in Europe	https://www.gbif.org/species/7572490	Species listed in Rasmont et al. (2017)
Megachilidae	Heriades	truncorum	(Linnaeus, 1758)	Least Concern (LC) in Europe	https://www.gbif.org/species/1336802	Species listed in Rasmont et al. (2017)
Megachilidae	Hoplitis	acuticornis	(Dufour & Perris, 1840)	Least Concern (LC) in Europe	https://www.gbif.org/species/1337115	Species listed in Rasmont et al. (2017)
Megachilidae	Hoplitis	adunca	(Panzer, 1798)	Least Concern (LC) in Europe	https://www.gbif.org/species/1337092	Species listed in Rasmont et al. (2017)
Megachilidae	Hoplitis	anthocopoides	(Schenck, 1853)	Least Concern (LC) in Europe	https://www.gbif.org/species/1337324	Species listed in Rasmont et al. (2017)
Megachilidae	Hoplitis	claviventris	(Thomson, 1872)	Least Concern (LC) in Europe	https://www.gbif.org/species/1337361	Species listed in Rasmont et al. (2017)
Megachilidae	Hoplitis	leucomelana	(Kirby, 1802)	Least Concern (LC) in Europe	https://www.gbif.org/species/1336921	Species listed in Rasmont et al. (2017)
Megachilidae	Hoplitis	mitis	(Nylander, 1852)	Least Concern (LC) in Europe	https://www.gbif.org/species/1337386	Species listed in Rasmont et al. (2017)
Megachilidae	Hoplitis	papaveris	(Latreille, 1799)	Least Concern (LC) in Europe	https://www.gbif.org/species/1337297	Species record originates from this study
Megachilidae	Hoplitis	ravouxi	(Pérez, 1902)	Least Concern (LC) in Europe	https://www.gbif.org/species/1337179	Species listed in Rasmont et al. (2017)
Megachilidae	Hoplitis	tridentata	(Dufour & Perris, 1840)	Least Concern (LC) in Europe	https://www.gbif.org/species/1337241	Species listed in Rasmont et al. (2017)
Megachilidae	Hoplitis	villosa	(Schenck, 1853)	Least Concern (LC) in Europe	https://www.gbif.org/species/1336926	Species listed in Rasmont et al. (2017)
Megachilidae	Megachile	alpicola	Alfken, 1924	Data Deficient (DD) in Europe	https://www.gbif.org/species/1336307	Species listed in Rasmont et al. (2017)
Megachilidae	Megachile	centuncularis	(Linnaeus, 1758)	Least Concern (LC) in Europe	https://www.gbif.org/species/1335505	Species listed in Rasmont et al. (2017)
Megachilidae	Megachile	circumcincta	(Kirby, 1802)	Least Concern (LC) in Europe	https://www.gbif.org/species/1336564	Species listed in Rasmont et al. (2017)
Megachilidae	Megachile	ericetorum	Lepeletier, 1841	Least Concern (LC) in Europe	https://www.gbif.org/species/1335321	Species listed in Rasmont et al. (2017)
Megachilidae	Megachile	ligniseca	(Kirby, 1802)	Data Deficient (DD) in Europe	https://www.gbif.org/species/1335802	Species listed in Rasmont et al. (2017)
Megachilidae	Megachile	maritima	(Kirby, 1802)	Data Deficient (DD) in Europe	https://www.gbif.org/species/1336431	Species listed in Vereecken (2018)
Megachilidae	Megachile	nigriventris	Schenck, 1870	Data Deficient (DD) in Europe	https://www.gbif.org/species/1335829	Species listed in Vereecken (2018)
Megachilidae	Megachile	pilidens	Alfken, 1924	Least Concern (LC) in Europe	https://www.gbif.org/species/1335229	Species listed in Rasmont et al. (2017)
Megachilidae	Megachile	pyrenaea	Pérez, 1890	Data Deficient (DD) in Europe	https://www.gbif.org/species/1335792	Species listed in Rasmont et al. (2017)
Megachilidae	Megachile	rotundata	(Fabricius, 1793)	Data Deficient (DD) in Europe	https://www.gbif.org/species/1335648	Species listed in Rasmont et al. (2017)
Megachilidae	Megachile	versicolor	Smith, 1844	Data Deficient (DD) in Europe	https://www.gbif.org/species/1336116	Species listed in Rasmont et al. (2017)
Megachilidae	Megachile	willughbiella	(Kirby, 1802)	Least Concern (LC) in Europe	https://www.gbif.org/species/1335556	Species listed in Rasmont et al. (2017)
Megachilidae	Osmia	aurulenta	(Panzer, 1799)	Least Concern (LC) in Europe	https://www.gbif.org/species/5039340	Species listed in Rasmont et al. (2017)
Megachilidae	Osmia	bicolor	(Schrank, 1781)	Least Concern (LC) in Europe	https://www.gbif.org/species/5039228	Species listed in Rasmont et al. (2017)
Megachilidae	Osmia	bicornis	(Linnaeus, 1758)	Least Concern (LC) in Europe	https://www.gbif.org/species/5039315	Species listed in Rasmont et al. (2017)
Megachilidae	Osmia	brevicornis	(Fabricius, 1798)	Least Concern (LC) in Europe	https://www.gbif.org/species/5039166	Species listed in Rasmont et al. (2017)
Megachilidae	Osmia	caerulescens	(Linnaeus, 1758)	Least Concern (LC) in Europe	https://www.gbif.org/species/5039096	Species listed in Rasmont et al. (2017)
Megachilidae	Osmia	cornuta	(Latreille, 1805)	Least Concern (LC) in Europe	https://www.gbif.org/species/5039293	Species listed in Rasmont et al. (2017)
Megachilidae	Osmia	emarginata	Lepeletier, 1841	Least Concern (LC) in Europe	https://www.gbif.org/species/5039384	Species listed in Rasmont et al. (2017)
Megachilidae	Osmia	gallarum	Spinola, 1808	Least Concern (LC) in Europe	https://www.gbif.org/species/5039176	Species listed in Rasmont et al. (2017)
Megachilidae	Osmia	inermis	(Zetterstedt, 1838)	Least Concern (LC) in Europe	https://www.gbif.org/species/5039209	Species listed in Rasmont et al. (2017)
Megachilidae	Osmia	leaiana	(Kirby, 1802)	Least Concern (LC) in Europe	https://www.gbif.org/species/5039039	Species listed in Rasmont et al. (2017)
Megachilidae	Osmia	mustelina	Gerstäcker, 1869	Least Concern (LC) in Europe	https://www.gbif.org/species/5039025	Species listed in Rasmont et al. (2017)
Megachilidae	Osmia	niveata	(Fabricius, 1804)	Least Concern (LC) in Europe	https://www.gbif.org/species/5039370	Species listed in Rasmont et al. (2017)
Megachilidae	Osmia	parietina	Curtis, 1828	Least Concern (LC) in Europe	https://www.gbif.org/species/5039158	Species listed in Rasmont et al. (2017)
Megachilidae	Osmia	pilicornis	Smith, 1846	Least Concern (LC) in Europe	https://www.gbif.org/species/5039061	Species listed in Rasmont et al. (2017)
Megachilidae	Osmia	rufohirta	Latreille, 1811	Least Concern (LC) in Europe	https://www.gbif.org/species/5039194	Species listed in Rasmont et al. (2017)
Megachilidae	Osmia	spinulosa	(Kirby, 1802)	Least Concern (LC) in Europe	https://www.gbif.org/species/6096937	Species listed in Rasmont et al. (2017)
Megachilidae	Osmia	uncinata	Gerstäcker, 1869	Least Concern (LC) in Europe	https://www.gbif.org/species/5039053	Species listed in Rasmont et al. (2017)
Megachilidae	Osmia	xanthomelana	(Kirby, 1802)	Least Concern (LC) in Europe	https://www.gbif.org/species/5039435	Species listed in Rasmont et al. (2017)
Megachilidae	Pseudoanthidium	scapulare	(Latreille, 1809)	Data Deficient (DD) in Europe	https://www.gbif.org/species/1334638	Species listed in Rasmont et al. (2017)
Megachilidae	Stelis	breviuscula	Nylander, 1848	Least Concern (LC) in Europe	https://www.gbif.org/species/1334278	Species listed in Rasmont et al. (2017)
Megachilidae	Stelis	minima	Schenck, 1861	Least Concern (LC) in Europe	https://www.gbif.org/species/1334284	Species listed in Rasmont et al. (2017)
Megachilidae	Stelis	odontopyga	Noskiewicz, 1926	Least Concern (LC) in Europe	https://www.gbif.org/species/1334251	Species listed in Rasmont et al. (2017)
Megachilidae	Stelis	ornatula	(Klug, 1807)	Least Concern (LC) in Europe	https://www.gbif.org/species/1334214	Species listed in Rasmont et al. (2017)
Megachilidae	Stelis	phaeoptera	(Kirby, 1802)	Data Deficient (DD) in Europe	https://www.gbif.org/species/1334185	Species listed in Rasmont et al. (2017)
Megachilidae	Stelis	punctulatissima	(Kirby, 1802)	Least Concern (LC) in Europe	https://www.gbif.org/species/1334291	Species listed in Rasmont et al. (2017)
Megachilidae	Trachusa	byssina	(Panzer, 1798)	Least Concern (LC) in Europe	https://www.gbif.org/species/5038591	Species listed in Rasmont et al. (2017)
Melittidae	Dasypoda	hirtipes	(Fabricius, 1793)	Least Concern (LC) in Europe	https://www.gbif.org/species/1345858	Species listed in Rasmont et al. (2017)
Melittidae	Macropis	europaea	Warncke, 1973	Least Concern (LC) in Europe	https://www.gbif.org/species/1345909	Species listed in Rasmont et al. (2017)
Melittidae	Macropis	fulvipes	(Fabricius, 1804)	Least Concern (LC) in Europe	https://www.gbif.org/species/1345902	Species listed in Rasmont et al. (2017)
Melittidae	Melitta	haemorrhoidalis	(Fabricius, 1775)	Least Concern (LC) in Europe	https://www.gbif.org/species/9796233	Species listed in Rasmont et al. (2017)
Melittidae	Melitta	leporina	(Panzer, 1799)	Least Concern (LC) in Europe	https://www.gbif.org/species/5040875	Species listed in Rasmont et al. (2017)
Melittidae	Melitta	nigricans	Alfken, 1905	Least Concern (LC) in Europe	https://www.gbif.org/species/5040881	Species listed in Rasmont et al. (2017)
Melittidae	Melitta	tricincta	Kirby, 1802	Near Threatened (NT) in Europe	https://www.gbif.org/species/5040893	Species listed in Rasmont et al. (2017)
